# Supplementary material for: Transition metal nanoparticles dispersed in an alumina matrix as active and stable catalysts for COx-free hydrogen production from ammonia
Source: Royal Society of Chemistry journal article supplement (doi:10.1039/c5ta04179a), 2015-01-01
Supplement: c5ta04179a1.pdf [file c5ta04179a1.pdf]

**Transition metal nanoparticles dispersed in alumina matrix as active and stable catalysts for CO<sub>x</sub>-free hydrogen production from ammonia**

Ying-Qiu Gu,<sup>a</sup> Zhao Jin<sup>\*a</sup>, Hu Zhang,<sup>a</sup> Rong-Jie Xu,<sup>a</sup> Ming-Jiang Zheng,<sup>a</sup> Yu-Mei Guo,<sup>a</sup> Qi-Sheng Song<sup>a</sup> and Chun-Jiang Jia<sup>\*a</sup>

Key Laboratory for Colloid and Interface Chemistry, Key Laboratory of Special Aggregated Materials, School of Chemistry and Chemical Engineering, Shandong University, Jinan 250100, China

**Corresponding Author**

\*E-mail: jinzhaosdu.edu.cn, jiacjsdu.edu.cn

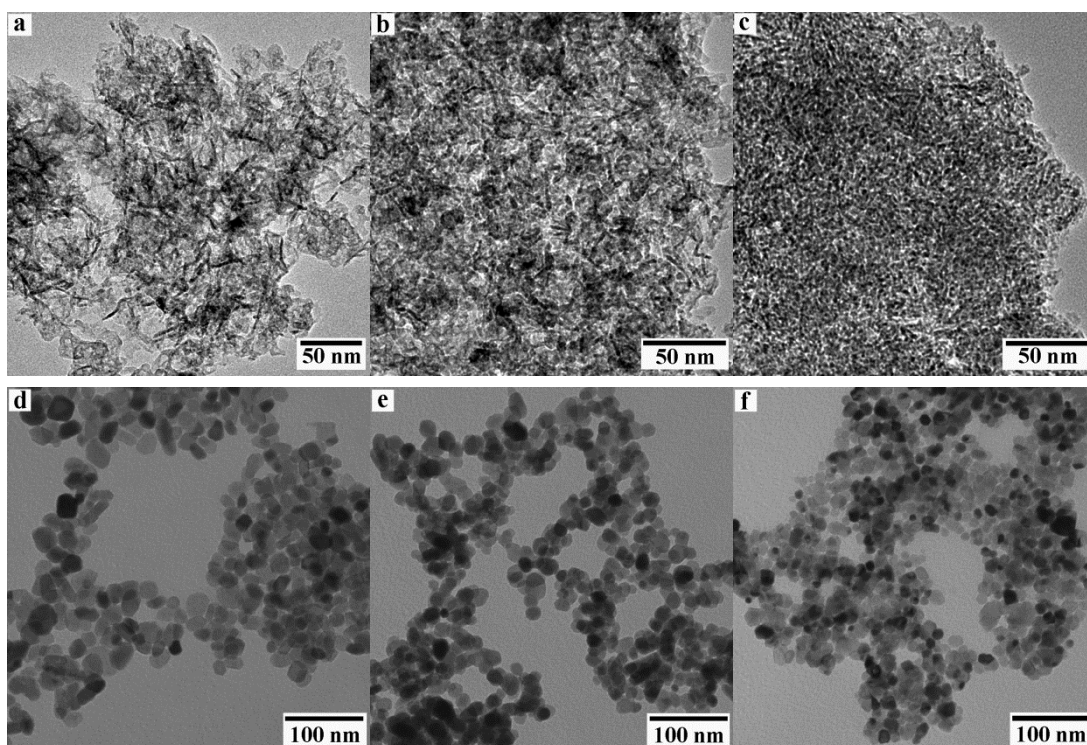

**Fig. S1** TEM images of the fresh 10FeAl (a), 10CoAl (b), 10NiAl (c), 100 Fe (d), 100Co (e) and 100Ni (f) catalysts.

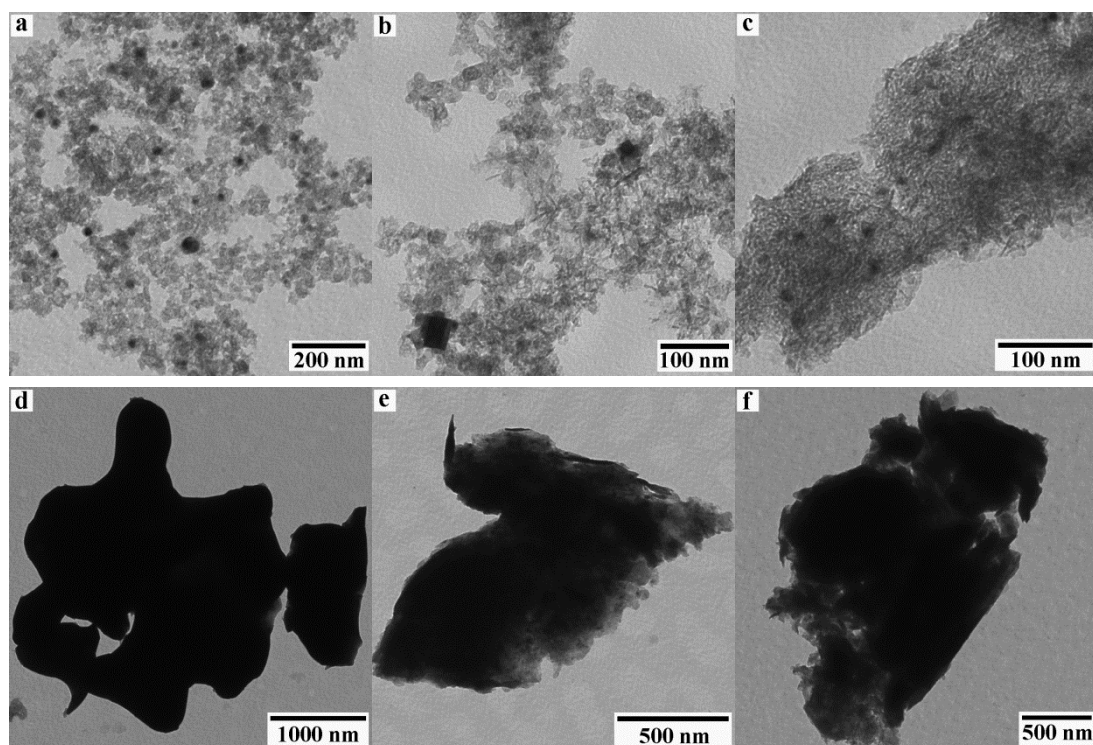

**Fig. S2** TEM images of the used 10FeAl (a), 10CoAl (b), 10NiAl (c), 100 Fe (d), 100Co (e) and 100Ni (f) catalysts.

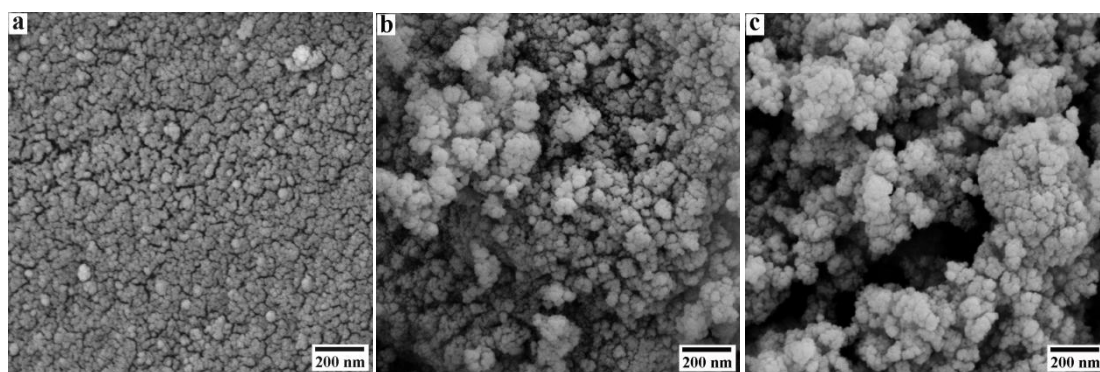

**Fig. S3** SEM images of the used  $^{90}\text{FeAl}$  (a),  $^{90}\text{CoAl}$  (b) and  $^{90}\text{NiAl}$  (c) catalysts.

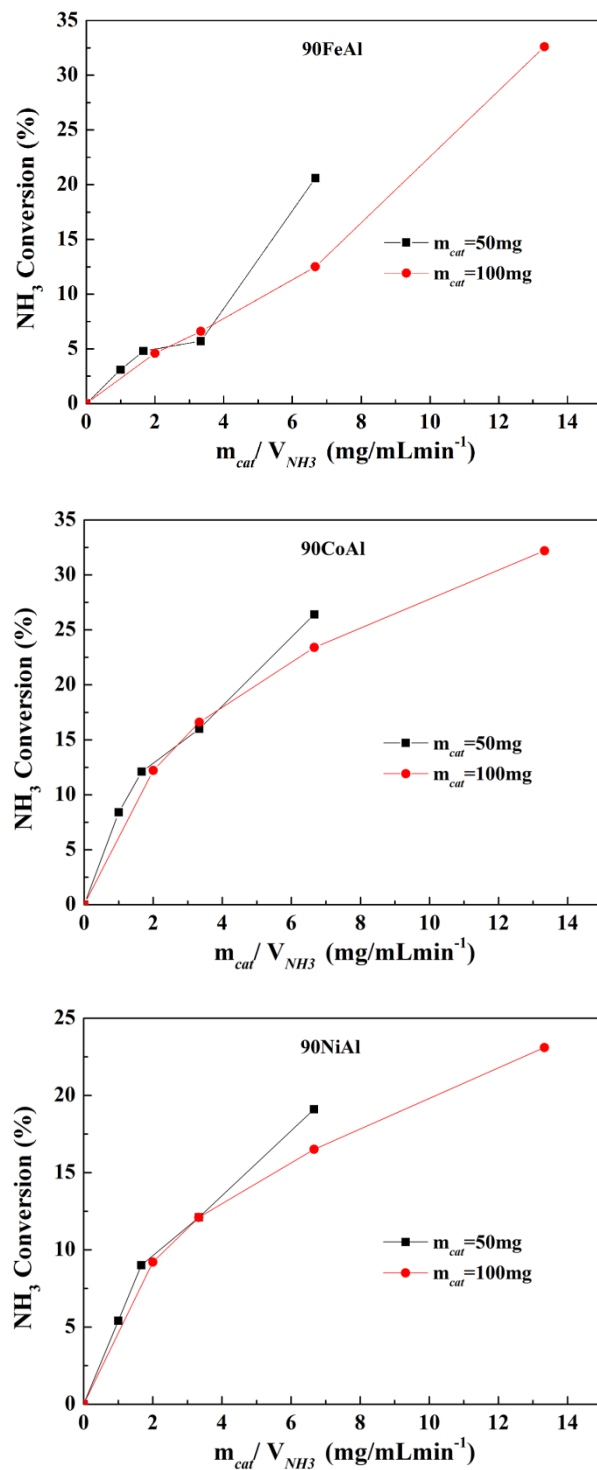

**Fig. S4** Mass transfer limitation study at 400 °C by change catalyst mass and  $\text{NH}_3$  flow.
